# Supplementary material
Source: MDPI journal article supplement (https://www.mdpi.com/2308-3417/8/1/15)
Supplement: s1 [file s1]

## **Supplementary Appendix**

### **Prevalence, Risk Factors and Outcomes Associated with Physical Restraint in Acute Medical Inpatients over 4 Years—A Retrospective Cohort Study**

Umberto Spennato <sup>1</sup>, Nathalie Lerjen <sup>1,\*</sup>, Jennifer Siegwart<sup>1</sup>, Beat Mueller<sup>1,2</sup>, Philipp Schuetz<sup>1,2</sup>, Daniel Koch<sup>1,¶</sup>, Tristan Struja<sup>1,¶</sup>

<sup>1</sup> Medical University Clinic, Kantonsspital Aarau, Aarau, Switzerland

<sup>2</sup> Medical Faculty of the University of Basel, Switzerland

\* Equally contributing first authors

¶ Equally contributing last authors.

VERSION: December 27, 2022

#### **Corresponding author and person to whom reprint requests should be addressed:**

Umberto Spennato, MUDr.

Medical University, Kantonsspital Aarau

Tellstrasse

CH-5001 Aarau, Switzerland

umberto.spennato@ksa.ch (E-Mail)

## **Supplementary Appendix**

**Table S1:** Depiction of missing data in table 1.

**Table S2:** Depiction of missing data in table 2.

**Table S3:** Indications for use of restraints and therapy with psychotropic medications.

**Table S1:** Missing Data from table 2.

| <b>Factor</b>                                 | <b>Overall</b>  | <b>Without restraints</b> | <b>With restraints</b> | <b>Overall (missing)</b> | <b>Without restraints (missing)</b> | <b>With restraints (missing)</b> |
|-----------------------------------------------|-----------------|---------------------------|------------------------|--------------------------|-------------------------------------|----------------------------------|
|                                               | <b>N=11,979</b> | <b>N=11,207</b>           | <b>N=772</b>           |                          |                                     |                                  |
| Age, years                                    | 11,979          | 11,207                    | 772                    | 0                        | 0                                   | 0                                |
| Gender                                        | 11,979          | 11,207                    | 772                    | 0                        | 0                                   | 0                                |
| Elixhauser CMI                                | 10,898          | 10,200                    | 698                    | 1,081                    | 1,007                               | 74                               |
| DOS points                                    | 4,512           | 4,073                     | 439                    | 7,467                    | 7,134                               | 333                              |
| Major disease (ICD-10 Code)                   | 11,979          | 11,207                    | 772                    | 0                        | 0                                   | 0                                |
| Place of discharge                            | 11,979          | 11,207                    | 772                    | 0                        | 0                                   | 0                                |
| Year of admission                             | 11,979          | 11,207                    | 772                    | 0                        | 0                                   | 0                                |
| LOS, days                                     | 11,979          | 11,207                    | 772                    | 0                        | 0                                   | 0                                |
| Nurses' time expenditure, hours per admission | 11,468          | 10,731                    | 737                    | 511                      | 476                                 | 35                               |
| In-hospital death                             | 11,979          | 11,207                    | 772                    | 0                        | 0                                   | 0                                |

**Table S2:** Depiction of missing data in table 2, part A available data.

|                                                                | <b>Without<br/>restraints</b> | <b>With<br/>restraints</b> | <b>Blanket<br/>restrictions</b> | <b>Belt</b> | <b>Bedrails</b> | <b>Sensor<br/>mats</b> |
|----------------------------------------------------------------|-------------------------------|----------------------------|---------------------------------|-------------|-----------------|------------------------|
|                                                                | <b>N=11,207</b>               | <b>N=772</b>               | <b>N=132</b>                    | <b>N=34</b> | <b>N=80</b>     | <b>N=666</b>           |
| Gender                                                         | 11,207                        | 772                        | 132                             | 34          | 80              | 666                    |
| DOS points                                                     | 4,073                         | 439                        | 63                              | 13          | 38              | 391                    |
| Year of admission                                              | 11,207                        | 772                        | 132                             | 34          | 80              | 666                    |
| Place of discharges                                            | 11,207                        | 772                        | 132                             | 34          | 80              | 666                    |
| LOS, days                                                      | 11,207                        | 772                        | 132                             | 34          | 80              | 666                    |
| Nurses' time expenditure<br>hours, hours per<br>admission      | 10,731                        | 737                        | 128                             | 32          | 76              | 634                    |
| Fall without restraint or<br>after start of a restraint        | 11,207                        | 772                        | 132                             | 34          | 80              | 666                    |
| Time difference between<br>fall and restraint, hours*          | 0                             | 174                        | 35                              | 11          | 29              | 146                    |
| Fall during first restraint<br>use                             | 11,207                        | 772                        | 132                             | 34          | 80              | 666                    |
| Restraint duration per<br>total counts of restraints,<br>hours | 0                             | 772                        | 132                             | 34          | 80              | 666                    |
| In-hospital death                                              | 11,207                        | 772                        | 132                             | 34          | 80              | 666                    |

**Table S2:** Depiction of missing data in table 2, part B missing data.

|                                                                | <b>Without<br/>restraints<br/>(missing)</b> | <b>With<br/>restraints<br/>(missing)</b> | <b>Blanket<br/>restrictions<br/>(missing)</b> | <b>Belt (missing)</b> | <b>Bedrails<br/>(missing)</b> | <b>Sensor<br/>mats<br/>(missing)</b> |
|----------------------------------------------------------------|---------------------------------------------|------------------------------------------|-----------------------------------------------|-----------------------|-------------------------------|--------------------------------------|
|                                                                | <b>N=11,207</b>                             | <b>N=772</b>                             | <b>N=132</b>                                  | <b>N=34</b>           | <b>N=80</b>                   | <b>N=666</b>                         |
| Gender                                                         | 0                                           | 0                                        | 0                                             | 0                     | 0                             | 0                                    |
| DOS points                                                     | 7,467                                       | 333                                      | 69                                            | 21                    | 42                            | 275                                  |
| Year of admission                                              | 0                                           | 0                                        | 0                                             | 0                     | 0                             | 0                                    |
| Place of discharges                                            | 0                                           | 0                                        | 0                                             | 0                     | 0                             | 0                                    |
| LOS, days                                                      | 0                                           | 0                                        | 0                                             | 0                     | 0                             | 0                                    |
| Nurses' time expenditure<br>hours, hours per<br>admission      | 476                                         | 35                                       | 4                                             | 2                     | 4                             | 32                                   |
| Fall without restraint or<br>after start of a restraint        | 0                                           | 0                                        | 0                                             | 0                     | 0                             | 0                                    |
| Time difference between<br>fall and restraint, hours*          | 11,207                                      | 598                                      | 97                                            | 23                    | 51                            | 520                                  |
| Fall during first restraint<br>use                             | 0                                           | 0                                        | 0                                             | 0                     | 0                             | 0                                    |
| Restraint duration per<br>total counts of restraints,<br>hours | 11,207                                      | 0                                        | 0                                             | 0                     | 0                             | 0                                    |
| In-hospital death                                              | 0                                           | 0                                        | 0                                             | 0                     | 0                             | 0                                    |

**Table S3:** Indications for use of restraints and therapy with psychotropic medications.

| <b>Indications</b>                  | <b>Total</b>        | <b>Blanket restriction</b> | <b>Belt</b>        | <b>Bedrails</b>     | <b>Sensor mats<sup>¶</sup></b> |
|-------------------------------------|---------------------|----------------------------|--------------------|---------------------|--------------------------------|
|                                     | <b>N=772 (100%)</b> | <b>N=132 (17.1%)</b>       | <b>N=34 (4.4%)</b> | <b>N=80 (10.4%)</b> | <b>N=666 (86.3%)</b>           |
| Delirium                            | 137 (64.6%)         | 99 (75.0%)                 | 21 (61.0%)         | 42 (52.0%)          | N/A                            |
| (Preventing) Falls                  | 56 (26.4%)          | 27 (20.5%)                 | 7 (21.0%)          | 28 (35.0%)          | N/A                            |
| (Preventing) Aggressive behavior    | 8 (3.8%)            | 4 (3.0%)                   | 4 (12.0%)          | 1 (1.0%)            | N/A                            |
| (Preventing) Wandering around       | 3 (1.4%)            | 2 (1.5%)                   | 0 (0.0%)           | 2 (3.0%)            | N/A                            |
| Other motive: Patient's request,    |                     |                            |                    |                     | N/A                            |
| Non-compliance with treatment, etc. | 8 (3.8%)            | 0 (0.0%)                   | 2 (6.0%)           | 7 (9.0%)            |                                |
| Benzodiazepines*                    |                     |                            |                    |                     |                                |
| No benzodiazepine                   | 83 (39.2%)          | 51 (38.6%)                 | 10 (29.0%)         | 32 (40.0%)          | N/A                            |
| Before first restraint              | 20 (9.4%)           | 10 (7.6%)                  | 3 (9.0%)           | 9 (1.0%)            | N/A                            |
| During first restraint              | 36 (17.0%)          | 21 (15.9%)                 | 7 (21.0%)          | 15 (19.0%)          | N/A                            |
| After first restraint               | 73 (34.4%)          | 50 (37.9%)                 | 14 (41.0%)         | 24 (30.0%)          | N/A                            |
| Antipsychotics <sup>#</sup>         |                     |                            |                    |                     | N/A                            |
| No antipsychotics                   | 47 (22.2%)          | 26 (19.7%)                 | 7 (21.0%)          | 19 (24.0%)          | N/A                            |
| Before first restraint              | 15 (7.1%)           | 8 (6.1%)                   | 3 (9.0%)           | 5 (6.0%)            | N/A                            |
| During first restraint              | 41 (19.3%)          | 25 (18.9%)                 | 6 (18.0%)          | 17 (21.0%)          | N/A                            |
| After first restraint               | 109 (51.4%)         | 73 (55.3%)                 | 18 (43.0%)         | 39 (49.0%)          | N/A                            |

Data are presented as median (IQR) for continuous measures, and n (%) for categorical measures. We manually extracted information on these restrictions, as the inclusion of the other restrictions occurred during the peer-review process, we do not have information for sensor mats.

Abbr.: N/A, not available

\* The most frequently used Benzodiazepines were lorazepam, midazolam and zolpidem.

<sup>#</sup> The most frequently used Antipsychotics were quetiapine, haloperidol and pipamperone.

<sup>¶</sup> Sensor mats were included into the study during the peer-review process, why hand searching further data was not possible anymore.
